# Supplementary material for: Universal digital high-resolution melt: a novel approach to broad-based profiling of heterogeneous biological samples
Source: PubMed Central journal article supplement (PMC3794612; doi:10.1093/nar/gkt684), 2013-08-09
Supplement: supp_gkt684_nar-00887-met-f-2013-File012.pdf [file supp_gkt684_nar-00887-met-f-2013-File012.pdf]

Supplementary Table 1. Sequencing results for organisms used in U-dHRM polymicrobial experiments.

| Organism                | V6 Sequencing Result                                                                 |
|-------------------------|--------------------------------------------------------------------------------------|
| <i>S. lugdunensis</i>   | aatcttgacatccttgaccgctctagagatagagtttcccctcgggggacaaagtgacaggtggtgcatggatgctgcagctaa |
| <i>S. aureus</i>        | gacatccttgacaactctagagatagagcctcccctcgggggacaaagtgacaggtggtgcatggatgctgcagctaa       |
| <i>S. saprophyticus</i> | tgacatccttgacaactctagagatagagcctcccctcgggggacaaagtgacaggtggtgcatggatgctgcagctaa      |
| <i>K. pneumoniae</i>    | ccacagaacttccagagatggattggtgcctcgggaactgtgagacaggtgctgcatggctgctgcagcta              |
